# Supplementary material for: Highly Efficient Synthesis of Substituted 3,4-Dihydropyrimidin-2-(1H)-ones (DHPMs) Catalyzed by Hf(OTf)4: Mechanistic Insights into Reaction Pathways under Metal Lewis Acid Catalysis and Solvent-Free Conditions
Source: Molecules. 2019 Jan 21;24(2):364. doi: 10.3390/molecules24020364 (PMC6359175; doi:10.3390/molecules24020364)
Supplement: Supplementary file 1 [file molecules-24-00364-s001.pdf]

## Supporting Information

### **Highly efficient synthesis of substituted 3,4-dihydropyrimidin-2-(1*H*)-ones (DHPMs) catalyzed by Hf(OTf)<sub>4</sub>: Mechanistic insights into reaction pathways under metal Lewis acid catalysis and solvent-free conditions**

Rui Kong, Shuai-Bo Han, Jing-Ying Wei, Xiao-Chong Peng, Zhen-Biao Xie,  
Shan-Shan Gong\* and Qi Sun\*

*Jiangxi Key Laboratory of Organic Chemistry, Jiangxi Science and Technology Normal University,  
605 Fenglin Avenue, Nanchang, Jiangxi 330013, PR China*

*E-mails: gongshanshan@jxstnu.edu.cn; sunqi@jxstnu.edu.cn*

#### Table of contents

|                                                                                                                   |              |
|-------------------------------------------------------------------------------------------------------------------|--------------|
| 1. The NMR spectra of DHPMs <b>1–14</b> and <b>20</b>                                                             | Page S2–S16  |
| 2. The NMR spectra of compounds <b>15–17</b> , <b>19</b> and <b>21</b>                                            | Page S17–S22 |
| 3. The <sup>1</sup> H-NMR tracing of H-D exchange reactions of methyl acetoacetate in MeOH- <i>d</i> <sub>4</sub> | Page S23     |

## 1. The NMR spectra of DHPMs 1–14 and 20

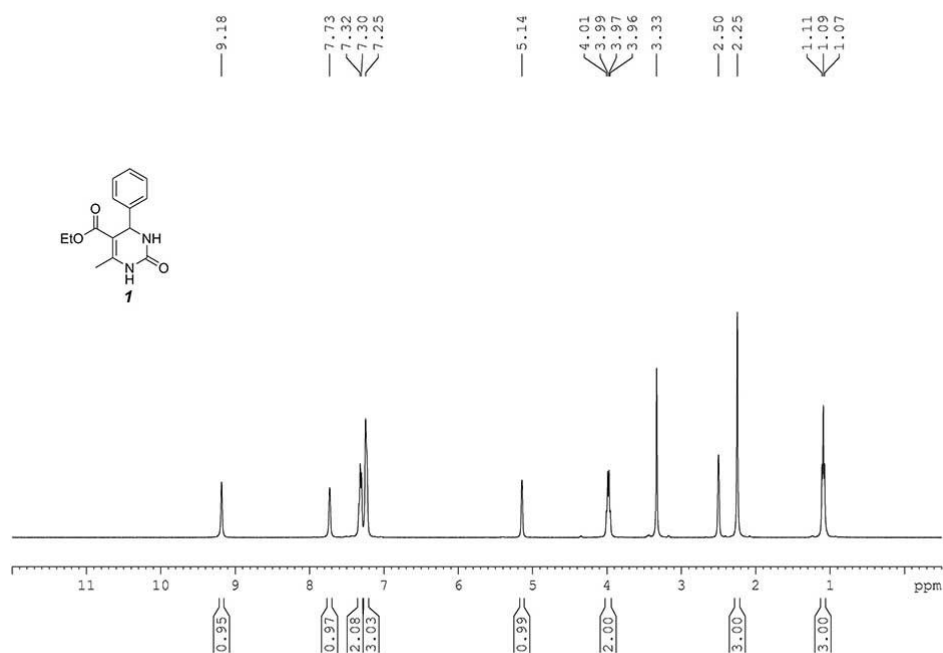

Figure S1. <sup>1</sup>H-NMR of **1**

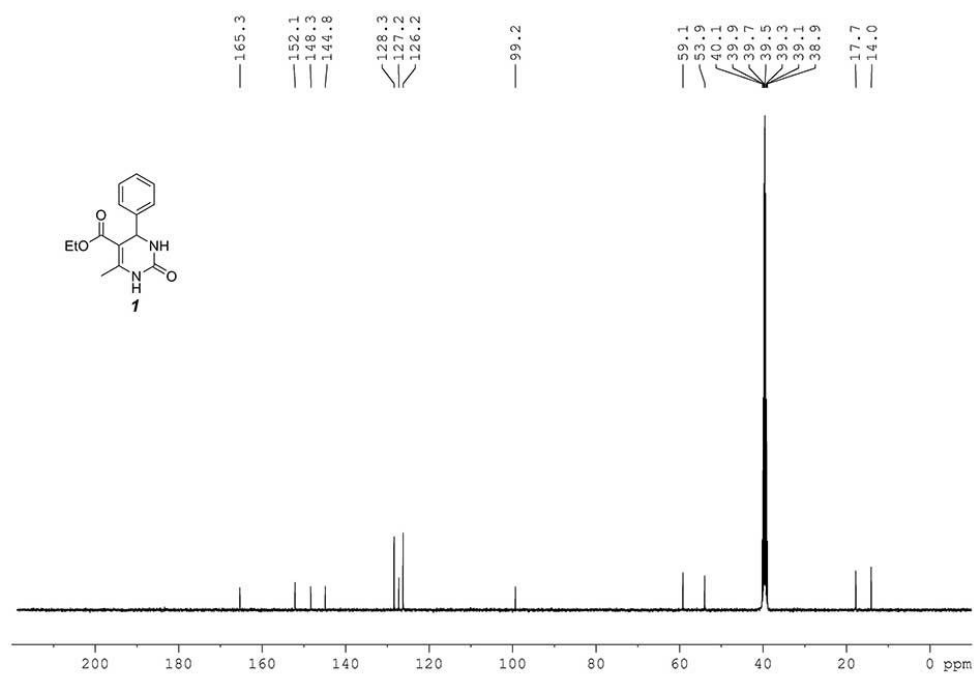

Figure S2. <sup>13</sup>C-NMR of **1**

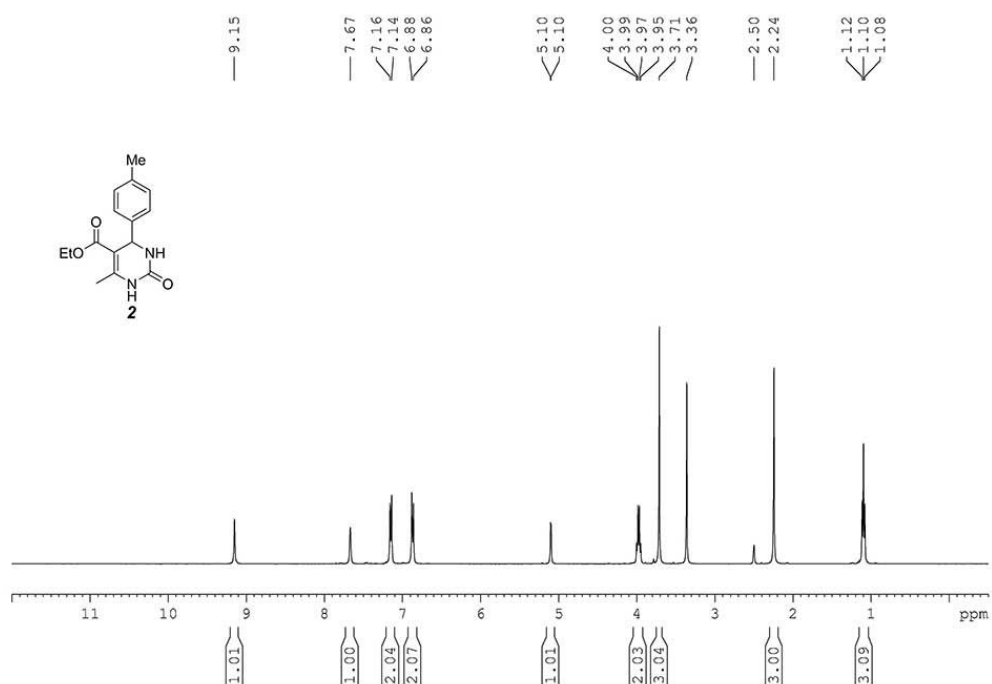

Figure S3. <sup>1</sup>H-NMR of **2**

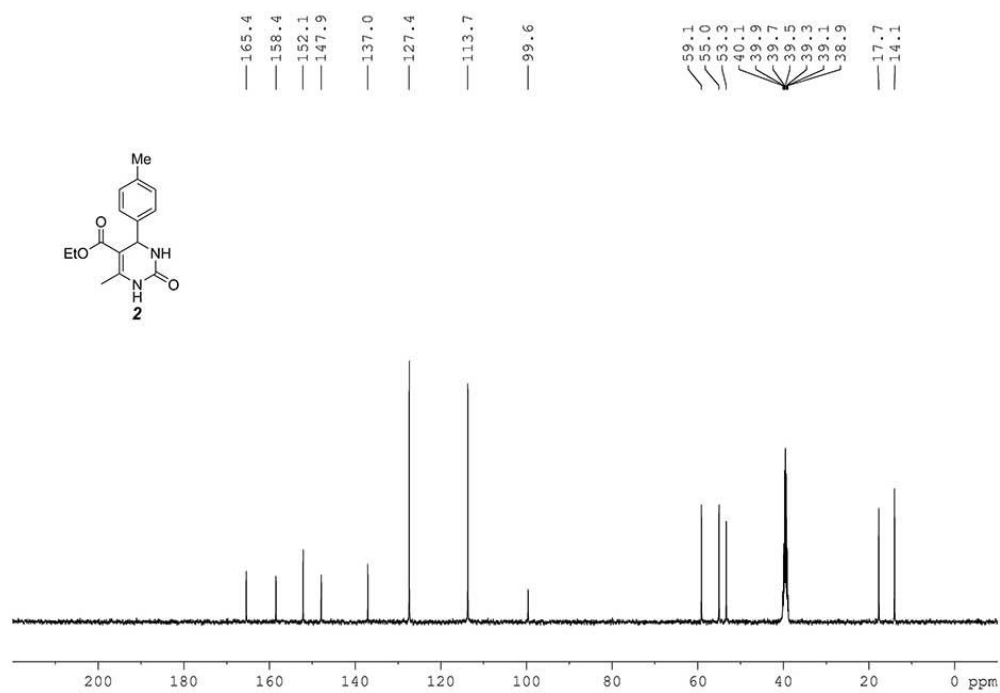

Figure S4. <sup>13</sup>C-NMR of **2**

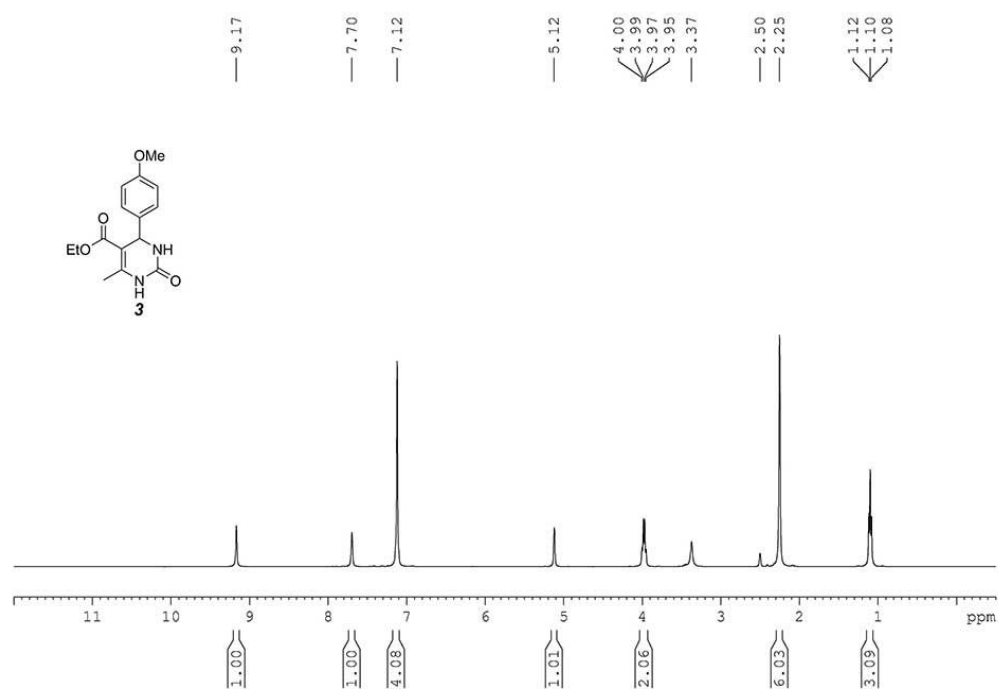

Figure S5. <sup>1</sup>H-NMR of **3**

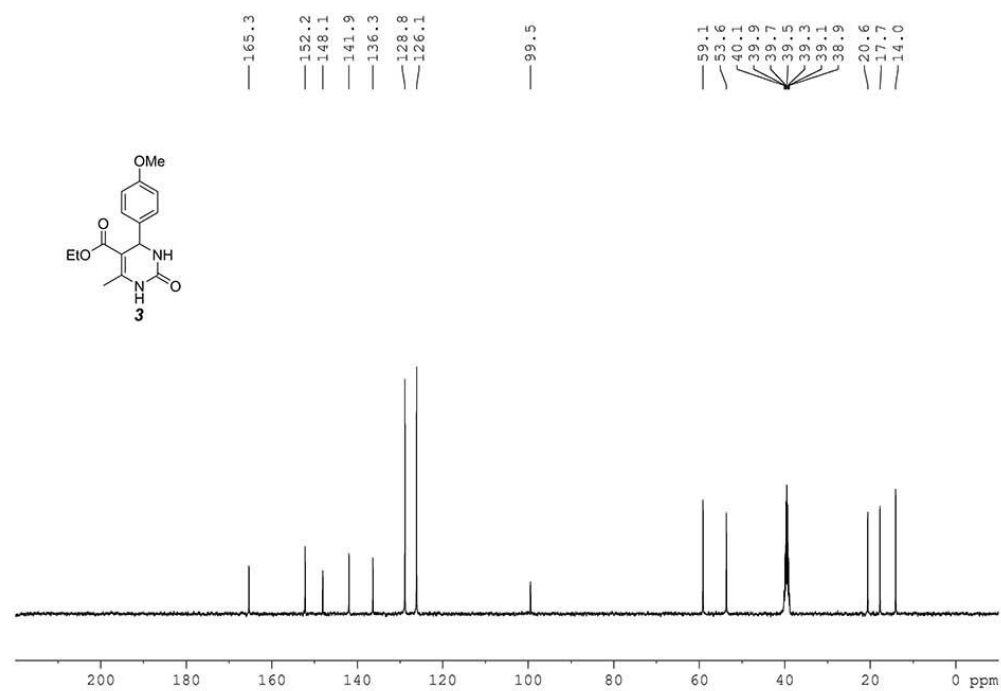

Figure S6. <sup>13</sup>C-NMR of **3**

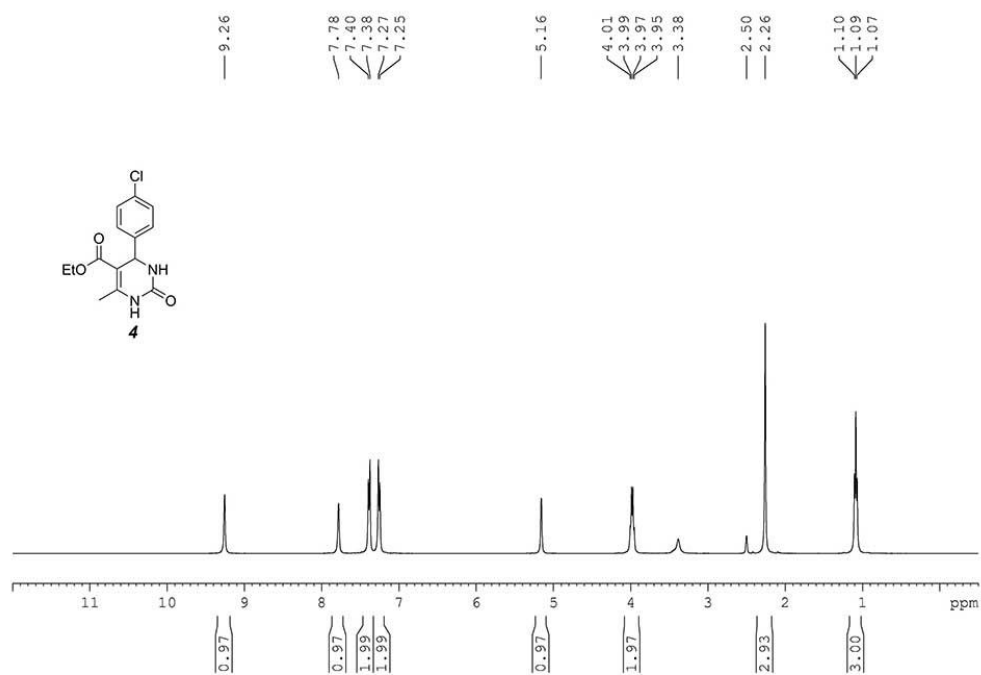

Figure S7. <sup>1</sup>H-NMR of **4**

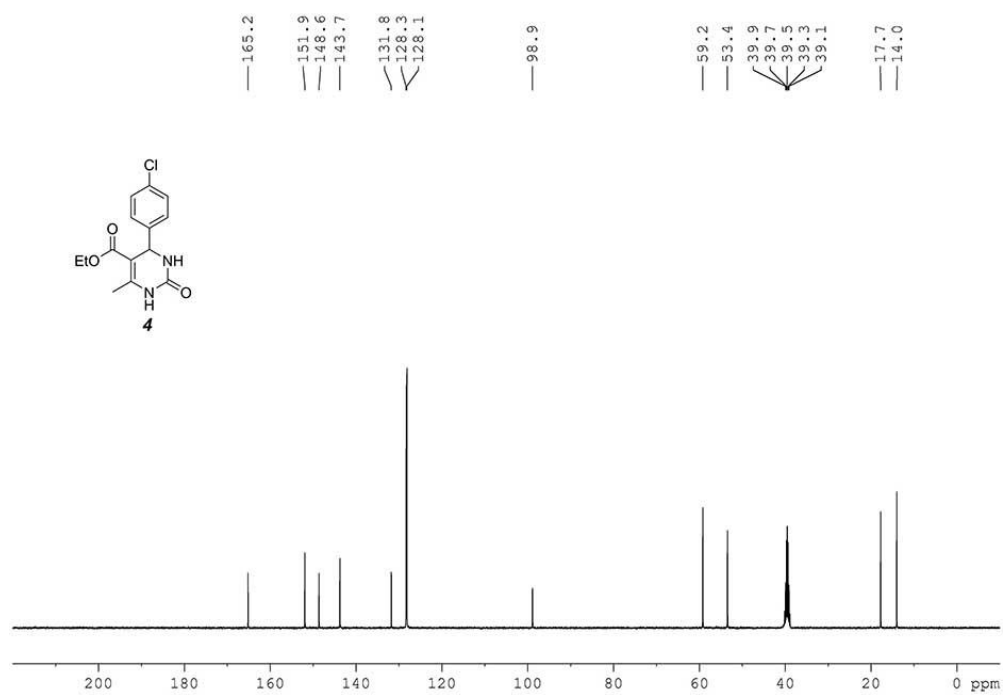

Figure S8. <sup>13</sup>C-NMR of **4**

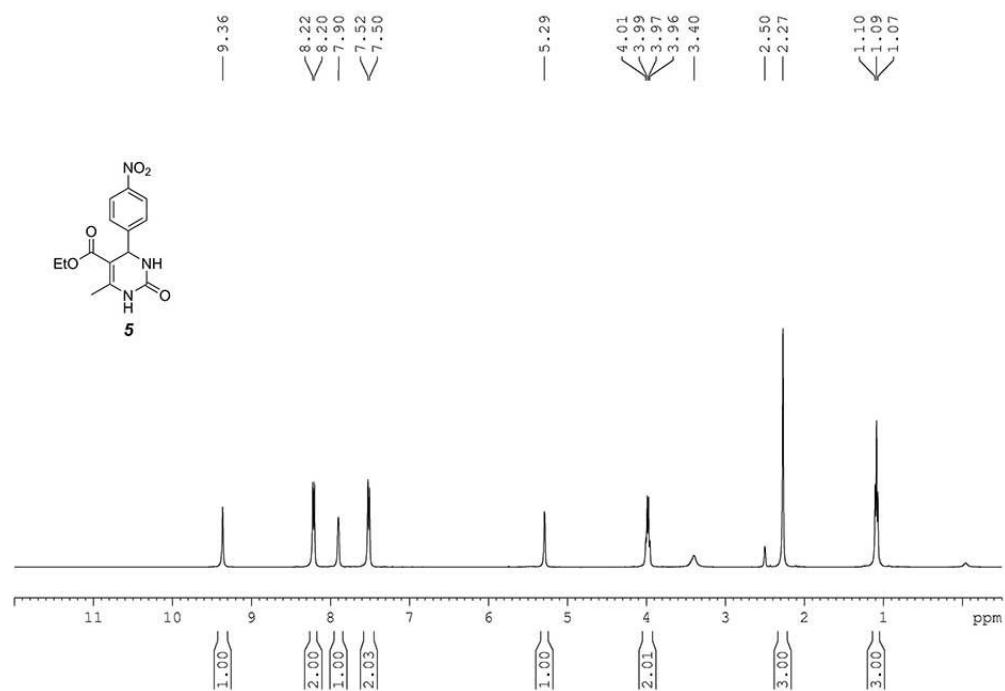

Figure S9. <sup>1</sup>H-NMR of **5**

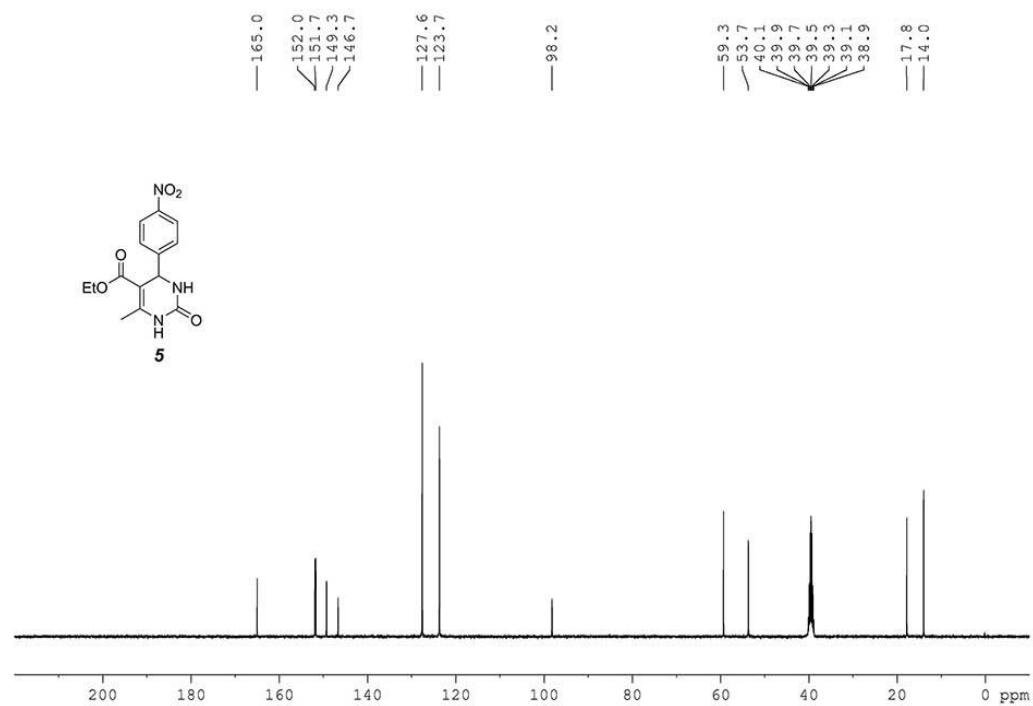

Figure S10. <sup>13</sup>C-NMR of **5**

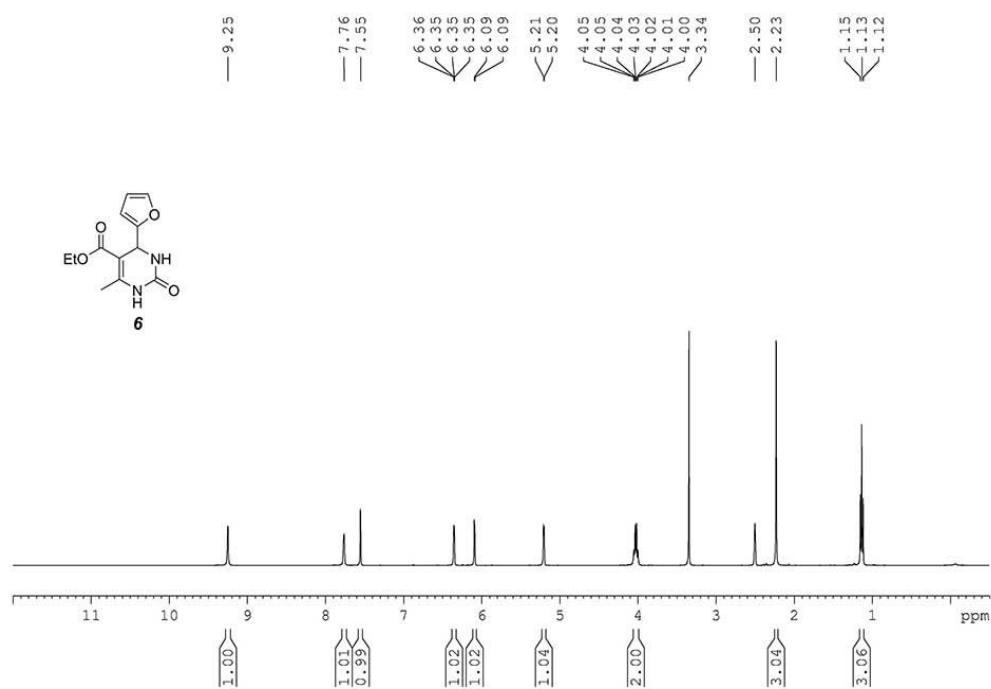

Figure S11. <sup>1</sup>H-NMR of **6**

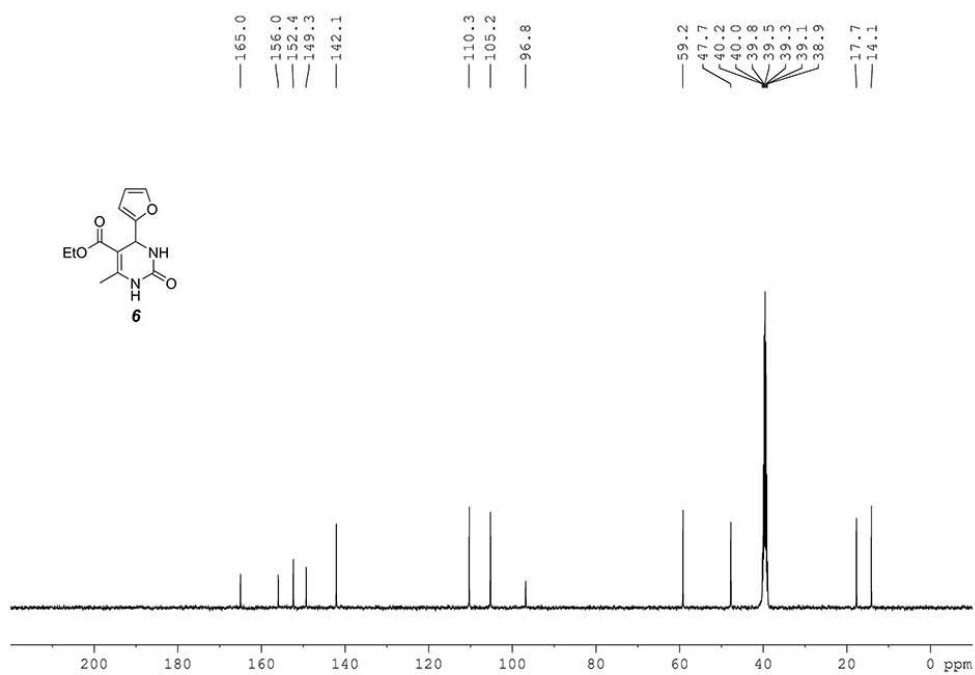

Figure S12. <sup>13</sup>C-NMR of **6**

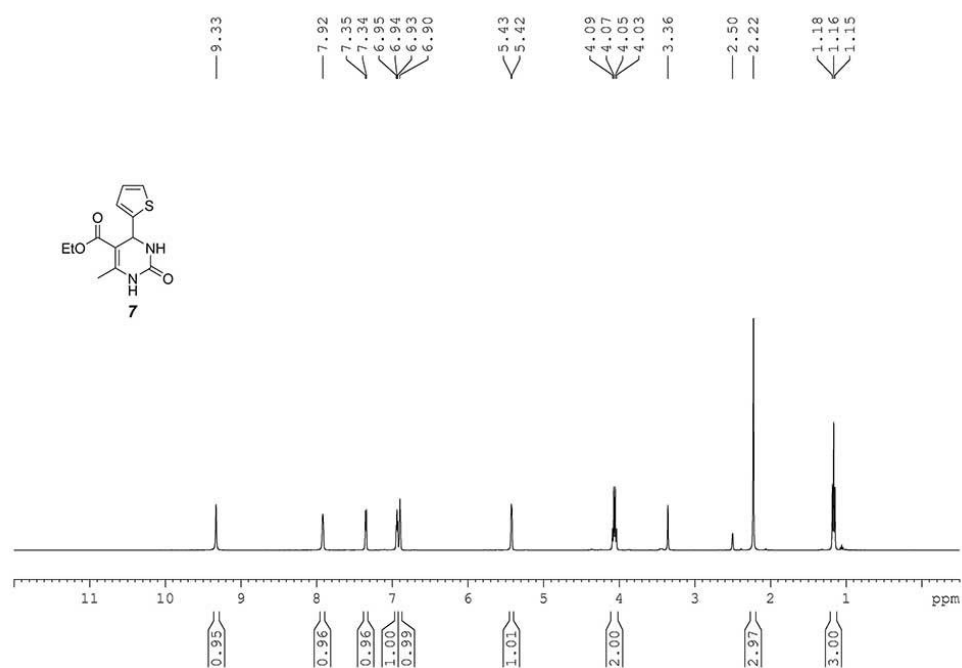

Figure S13. <sup>1</sup>H-NMR of **7**

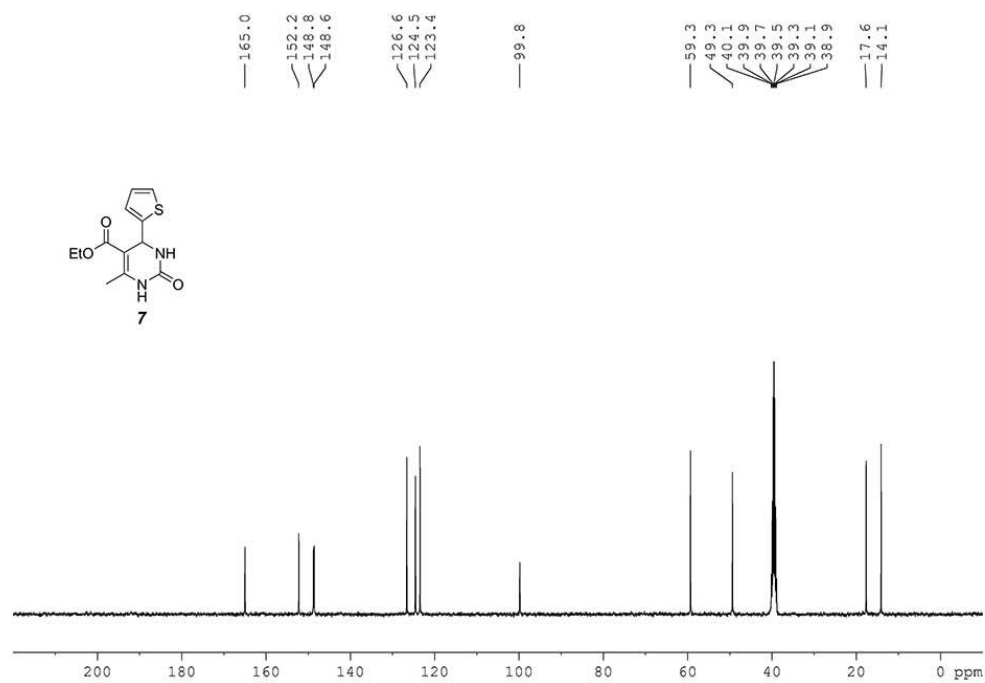

Figure S14. <sup>13</sup>C-NMR of **7**

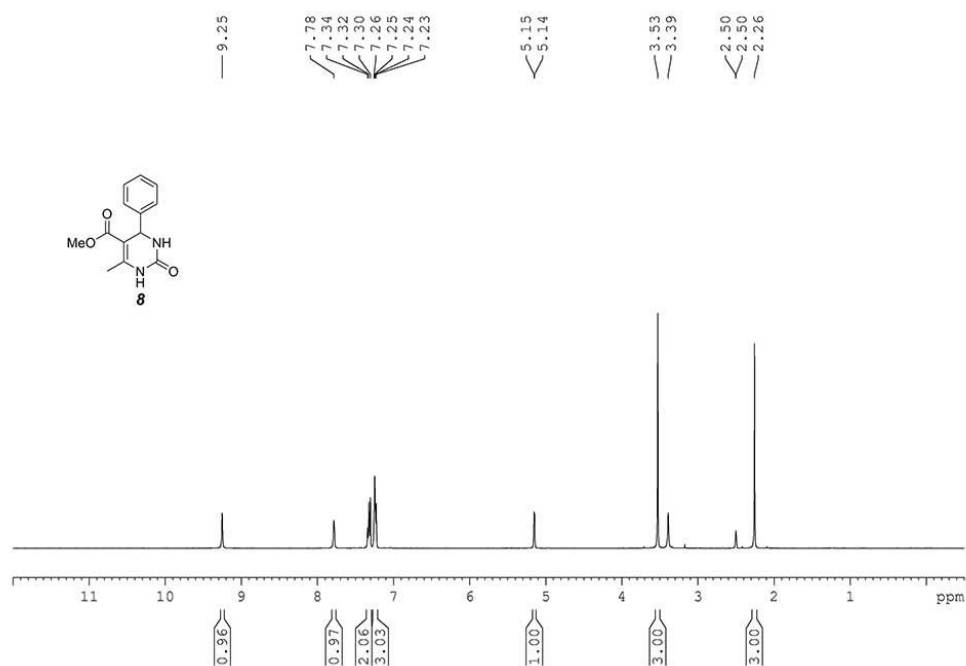

Figure S15.  $^1\text{H}$ -NMR of **8**

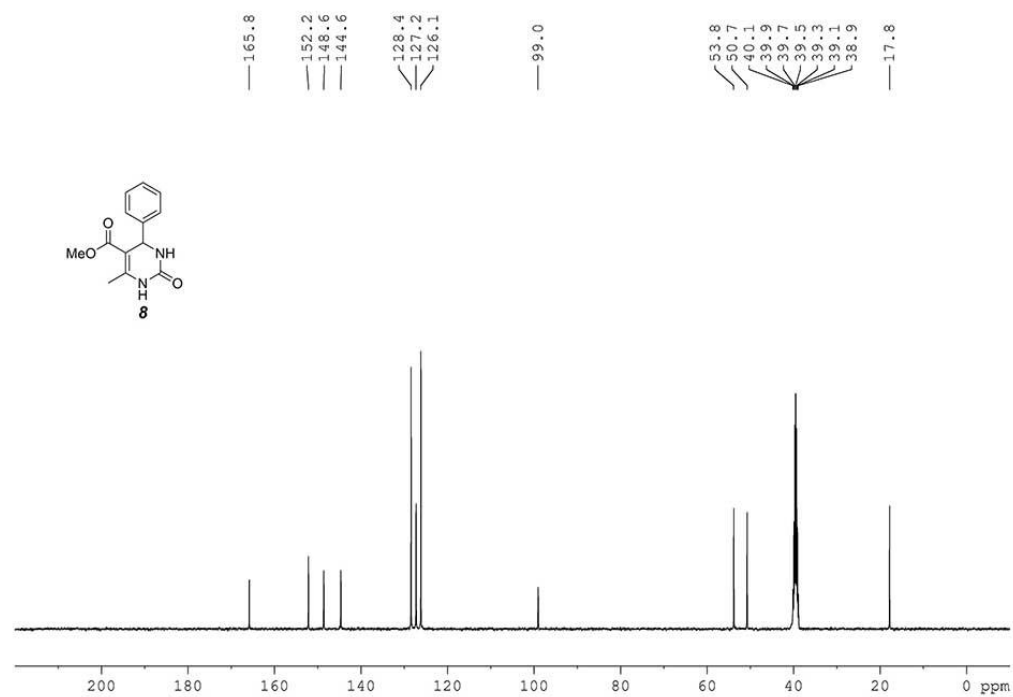

Figure S16.  $^{13}\text{C}$ -NMR of **8**

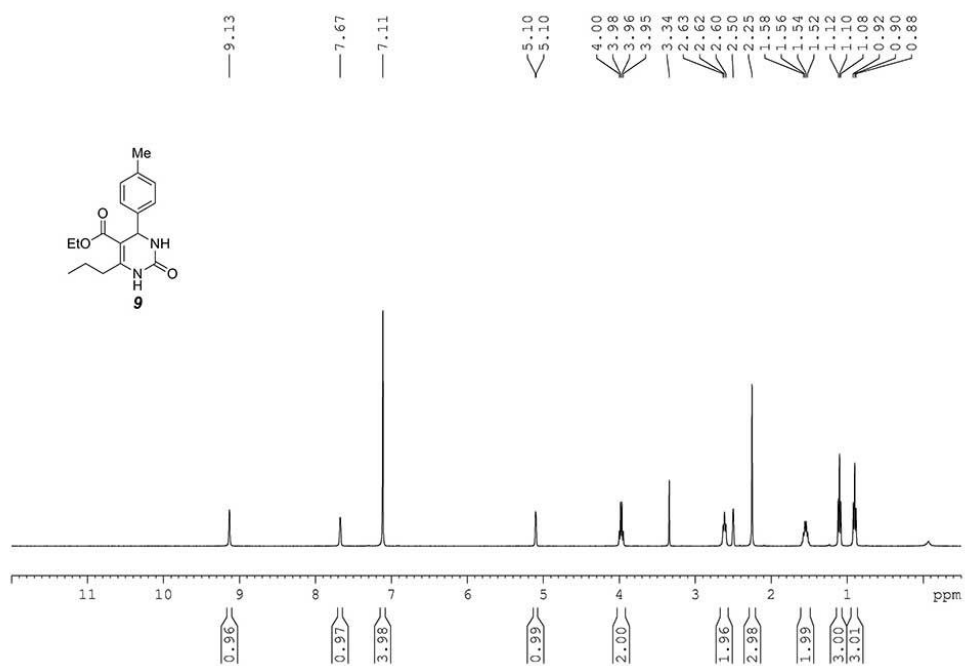

Figure S17. <sup>1</sup>H-NMR of **9**

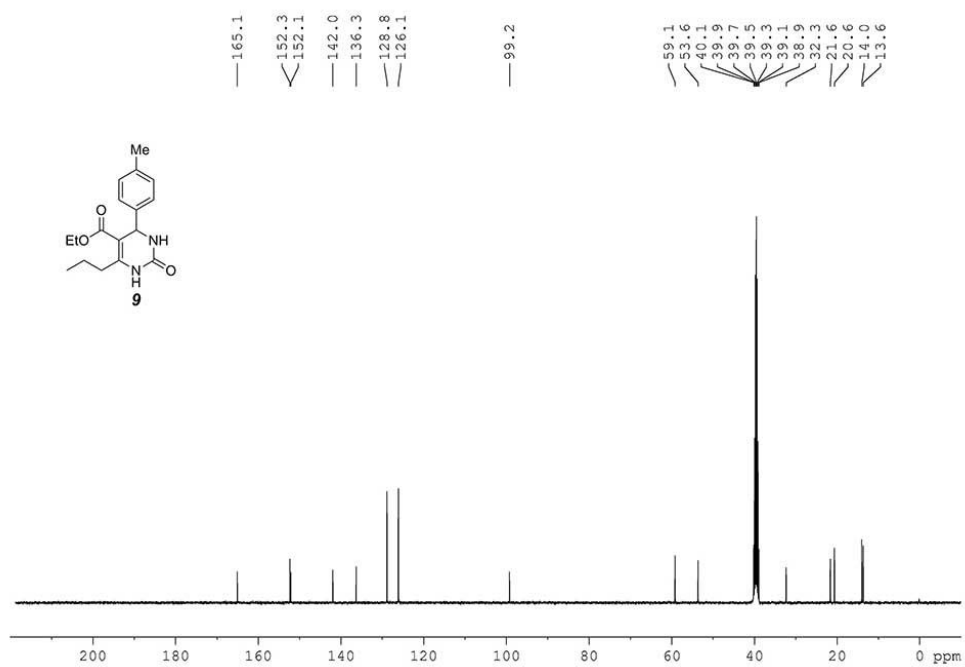

Figure S18. <sup>13</sup>C-NMR of **9**

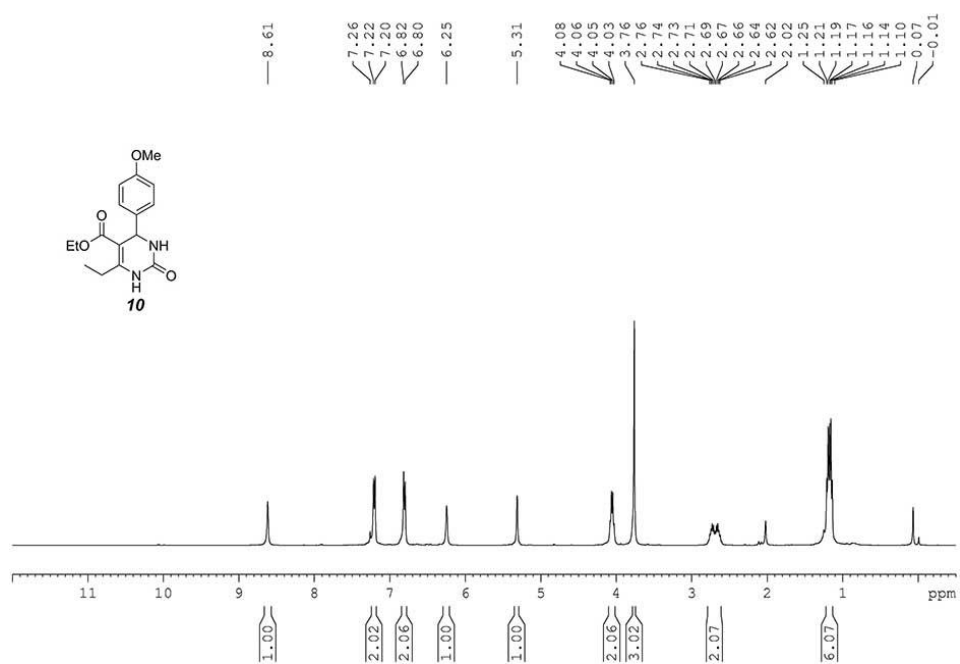

Figure S19. <sup>1</sup>H-NMR of **10**

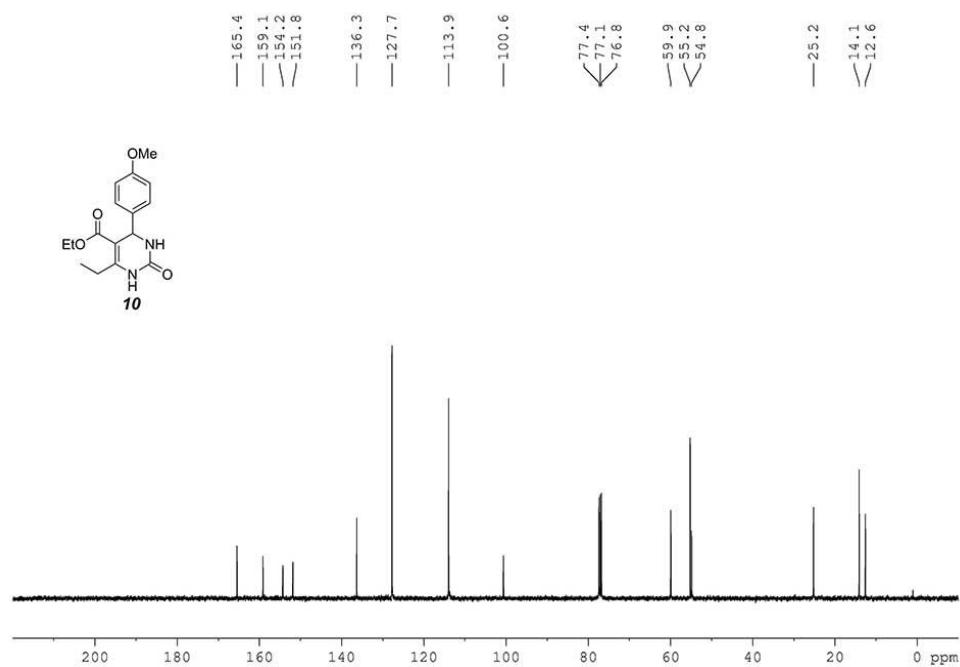

Figure S20. <sup>13</sup>C-NMR of **10**

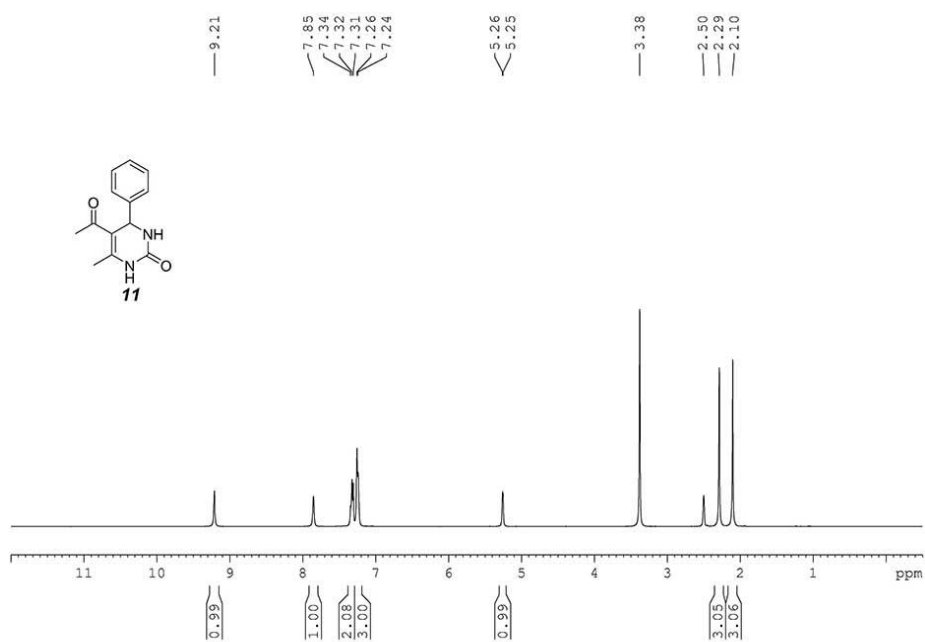

Figure S21. <sup>1</sup>H-NMR of **11**

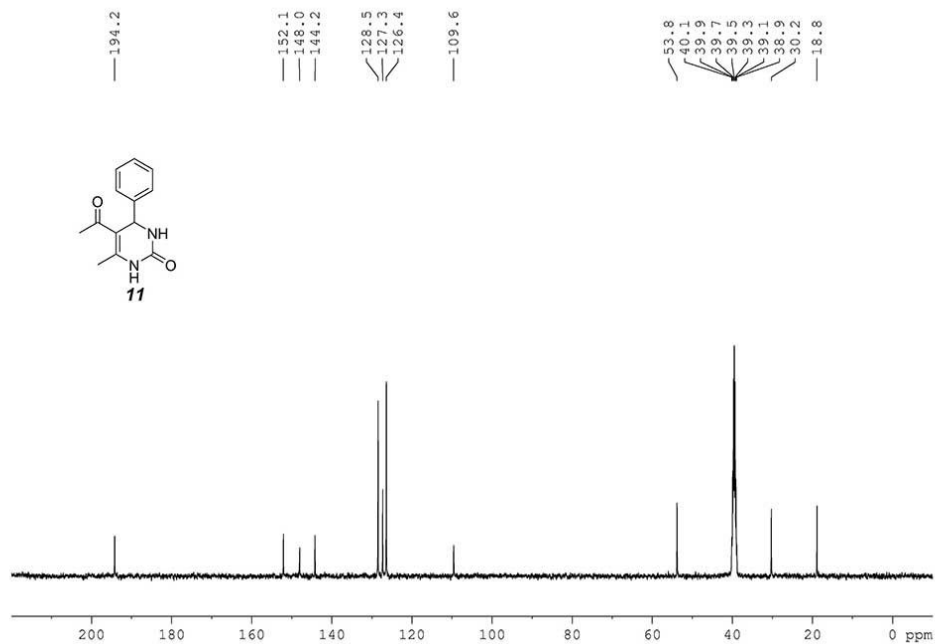

Figure S22. <sup>13</sup>C-NMR of **11**

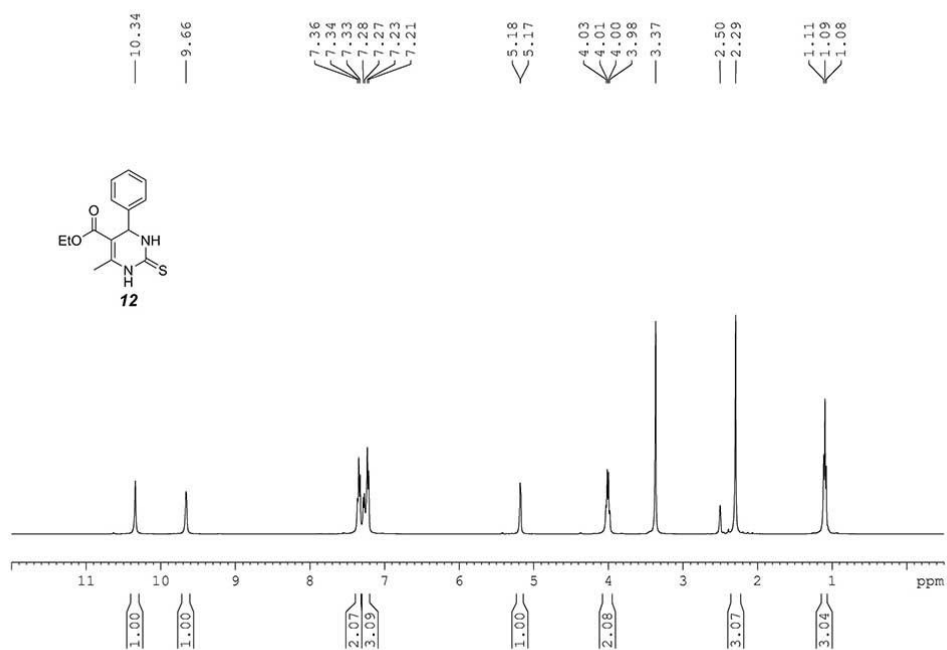

Figure S23. <sup>1</sup>H-NMR of **12**

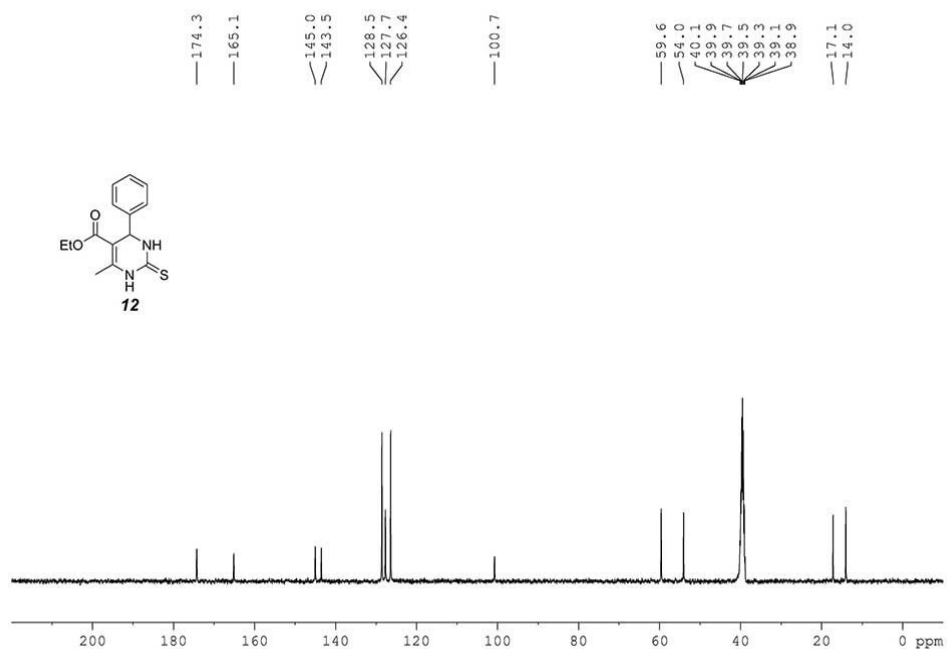

Figure S24. <sup>13</sup>C-NMR of **12**

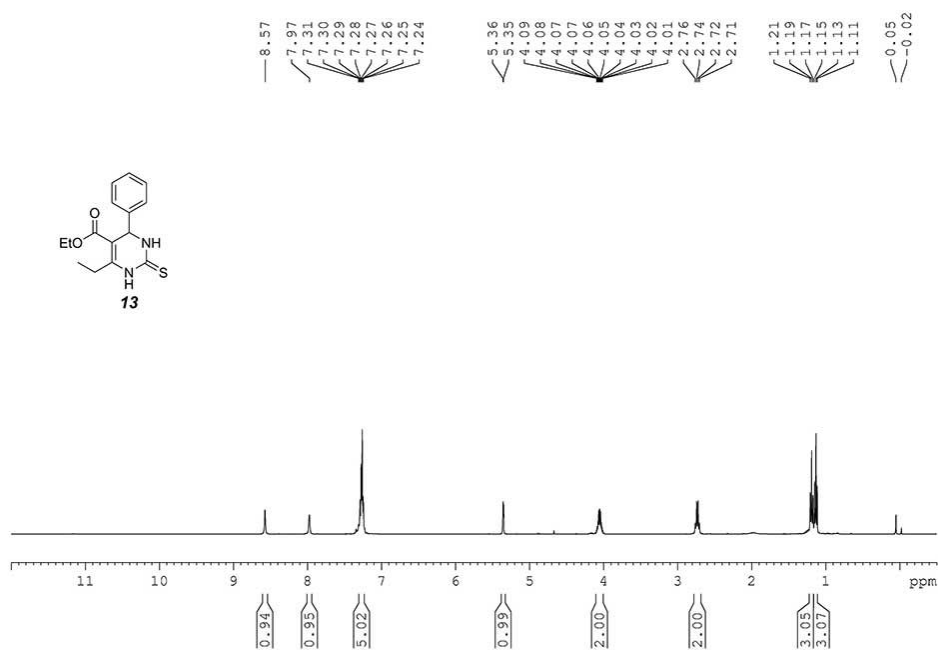

Figure S25. <sup>1</sup>H-NMR of **13**

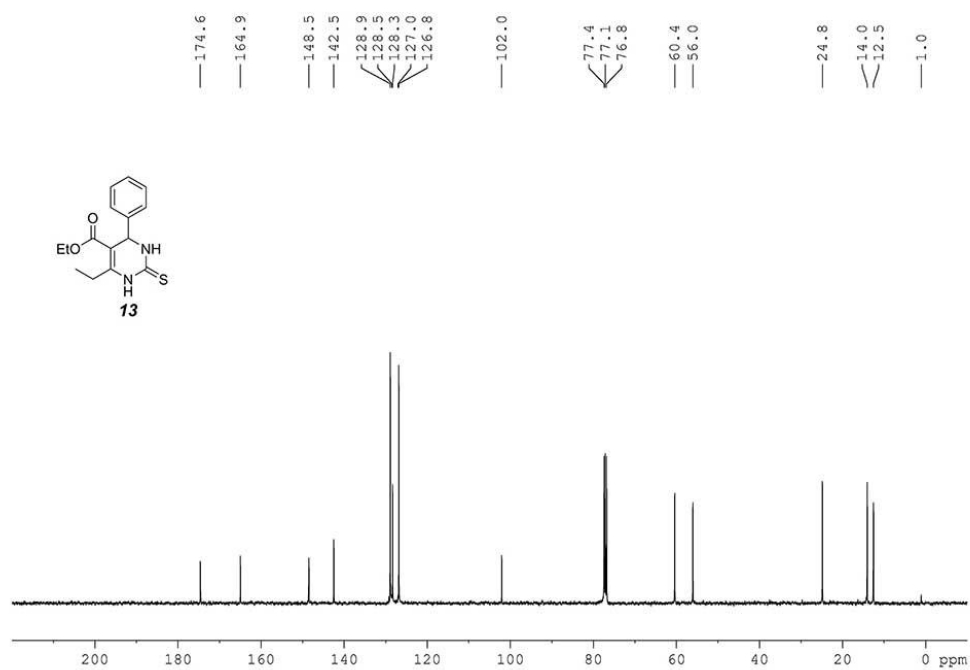

Figure S26. <sup>13</sup>C-NMR of **13**

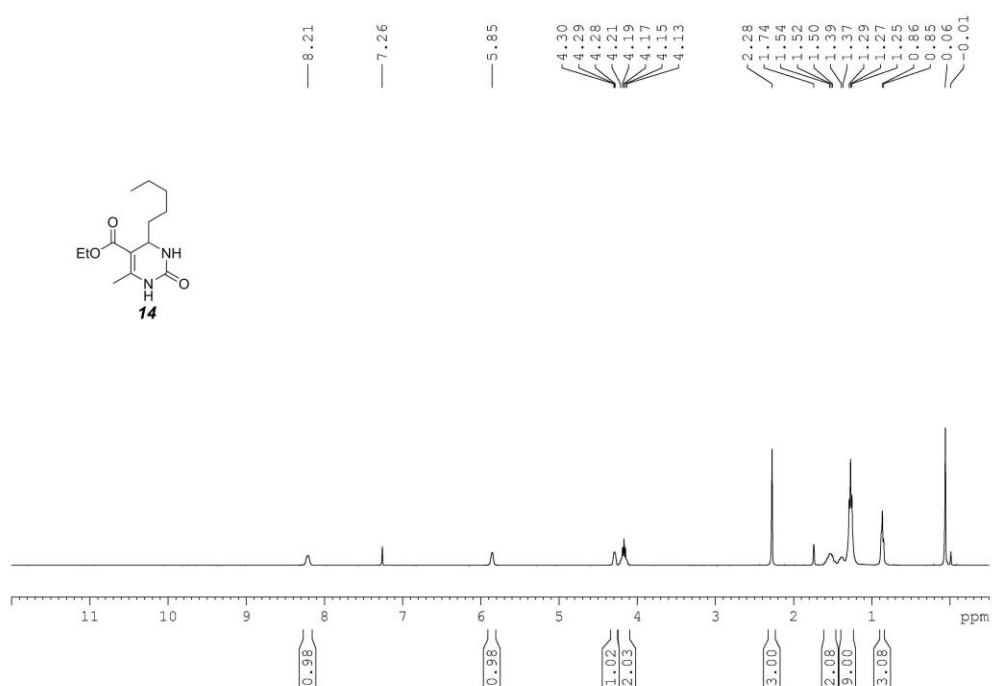

Figure S27. <sup>1</sup>H-NMR of **14**

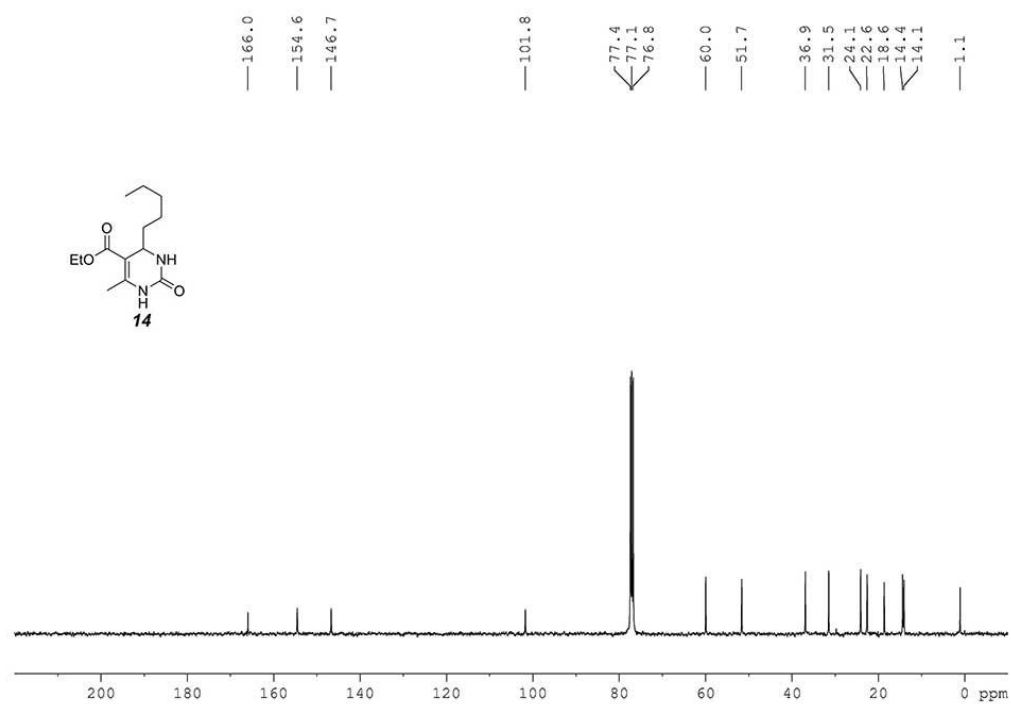

Figure S28. <sup>13</sup>C-NMR of **14**

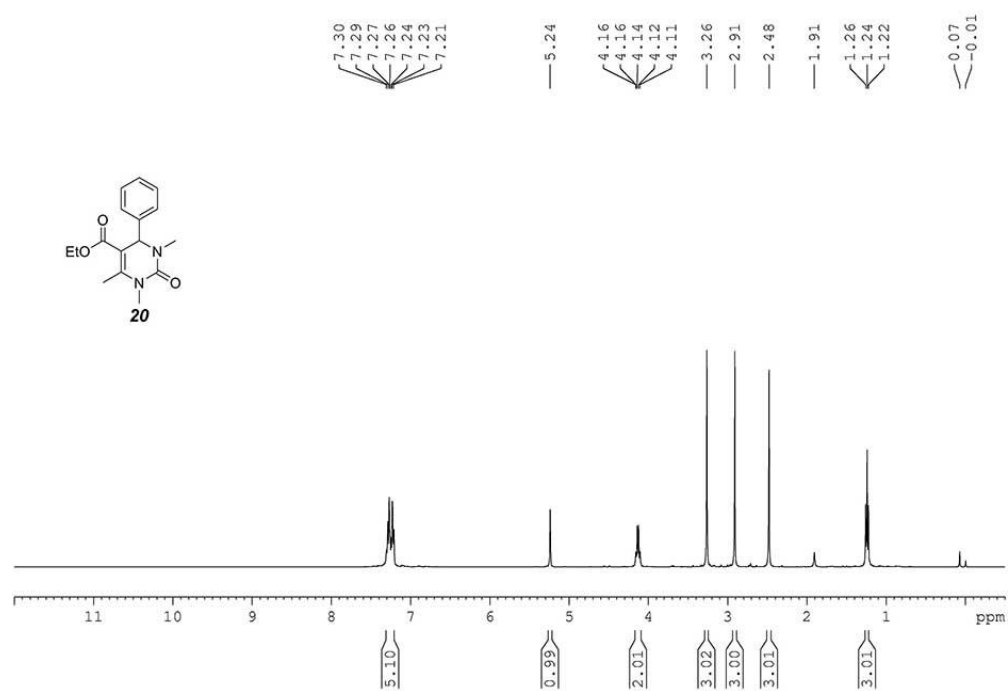

Figure S29. <sup>1</sup>H-NMR of **20**

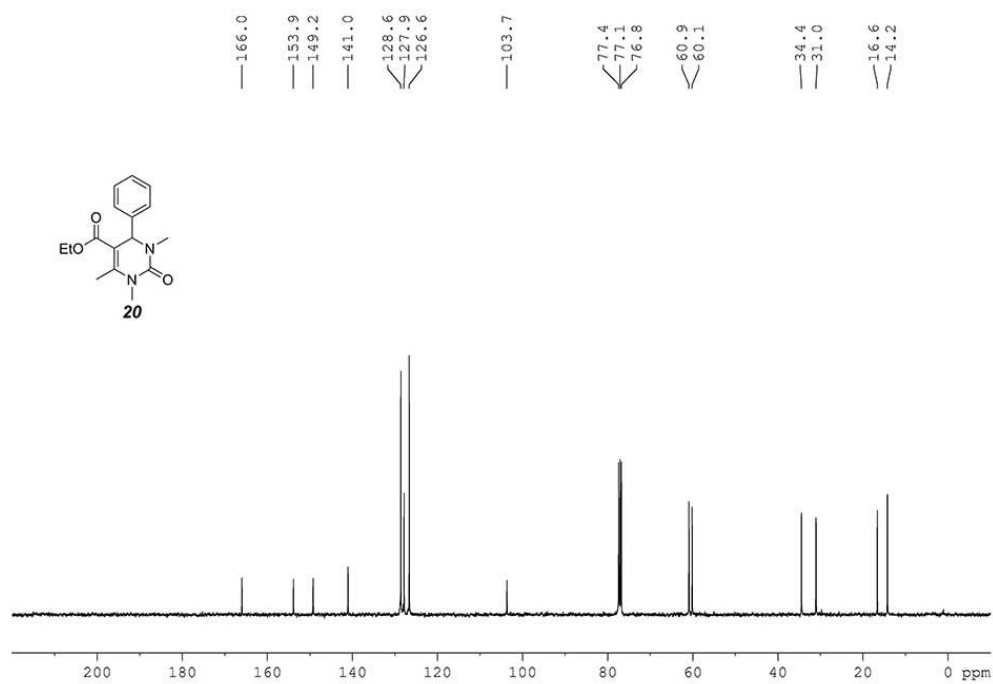

Figure S30. <sup>13</sup>C-NMR of **20**

2. The NMR spectra of compounds (15-17, 19, and 21).

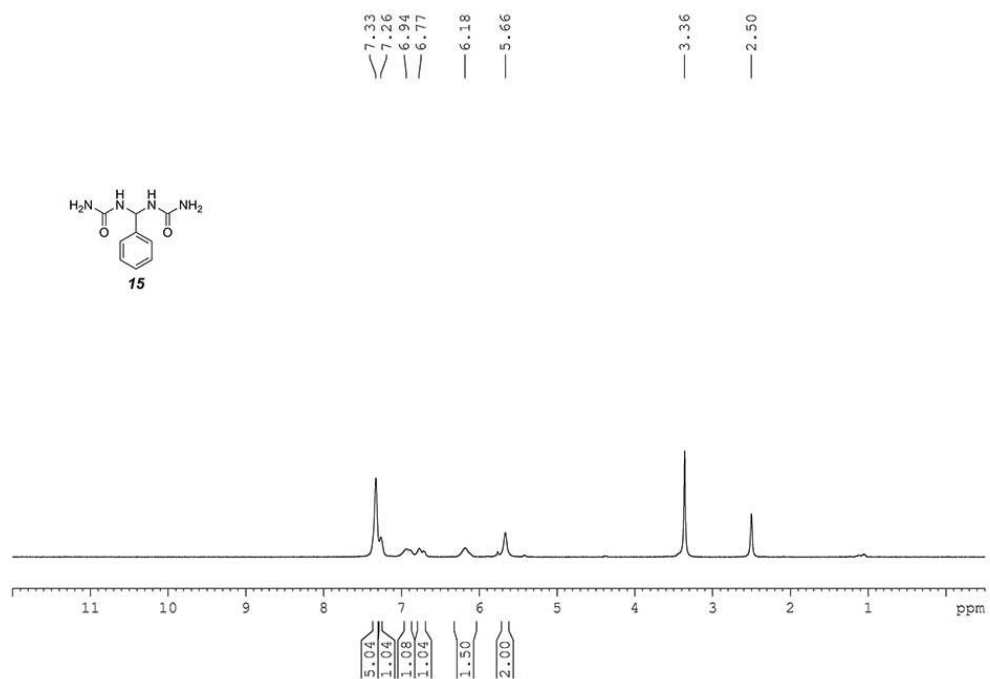

Figure S31. <sup>1</sup>H-NMR of **15**

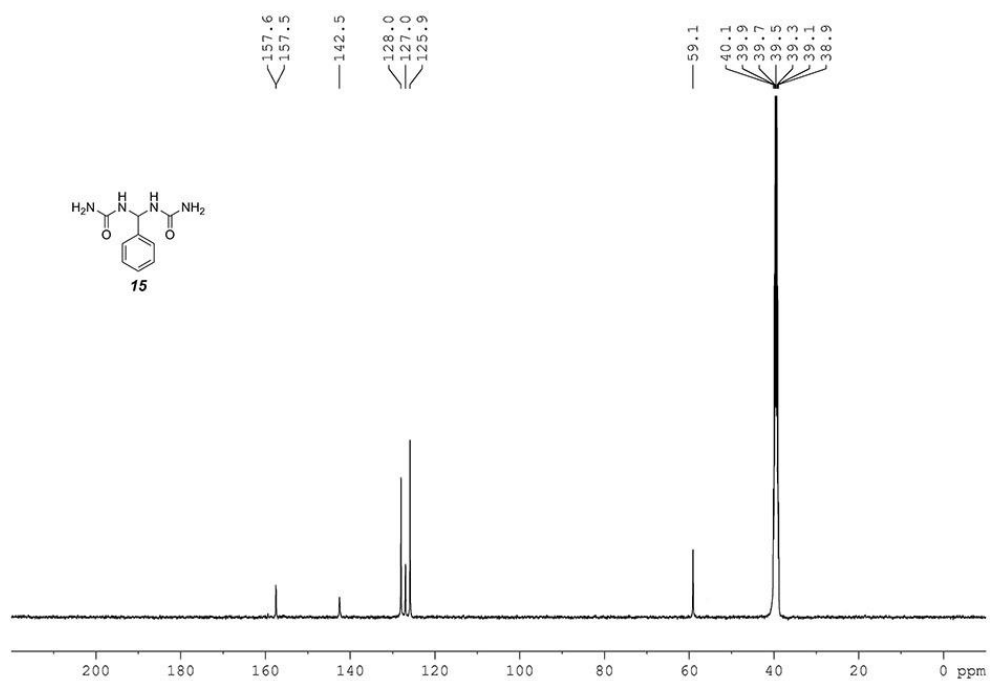

Figure S32. <sup>13</sup>C-NMR of **15**

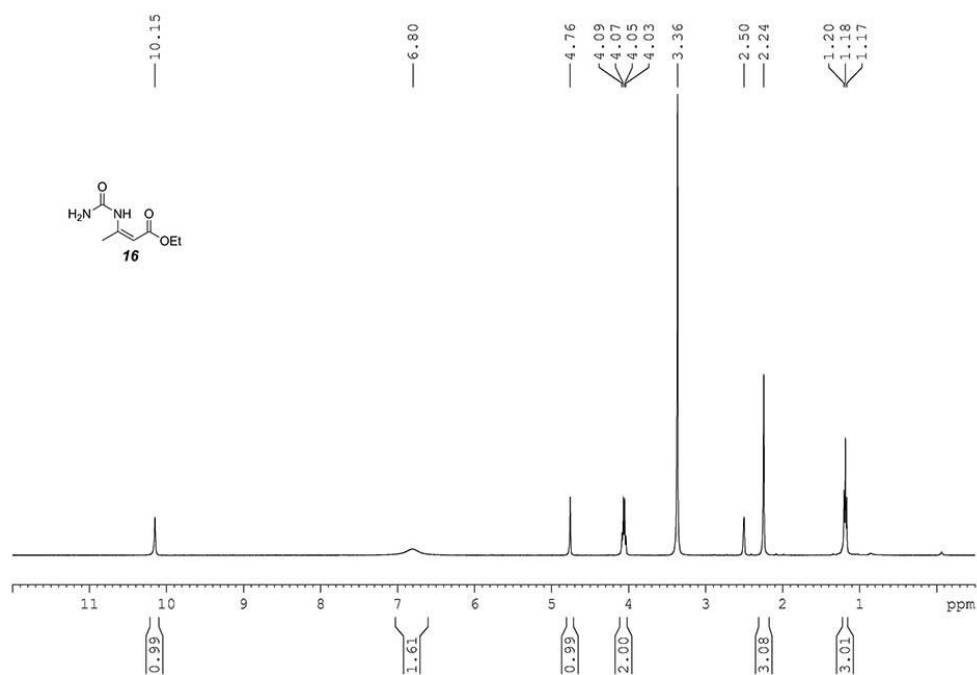

Figure S33. <sup>1</sup>H-NMR of **16**

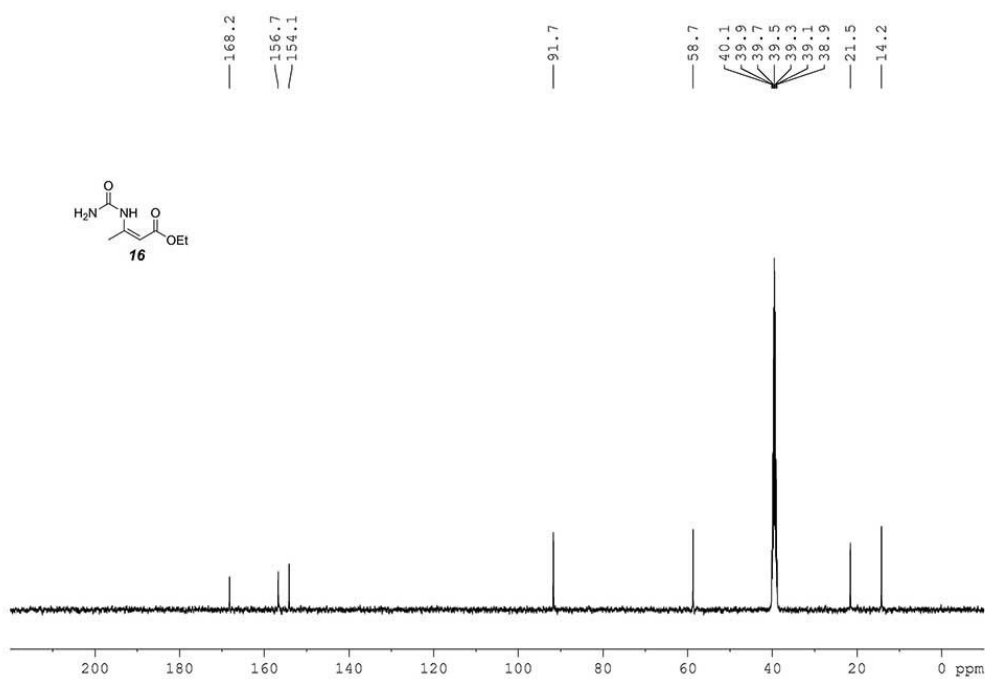

Figure S34. <sup>13</sup>C-NMR of **16**

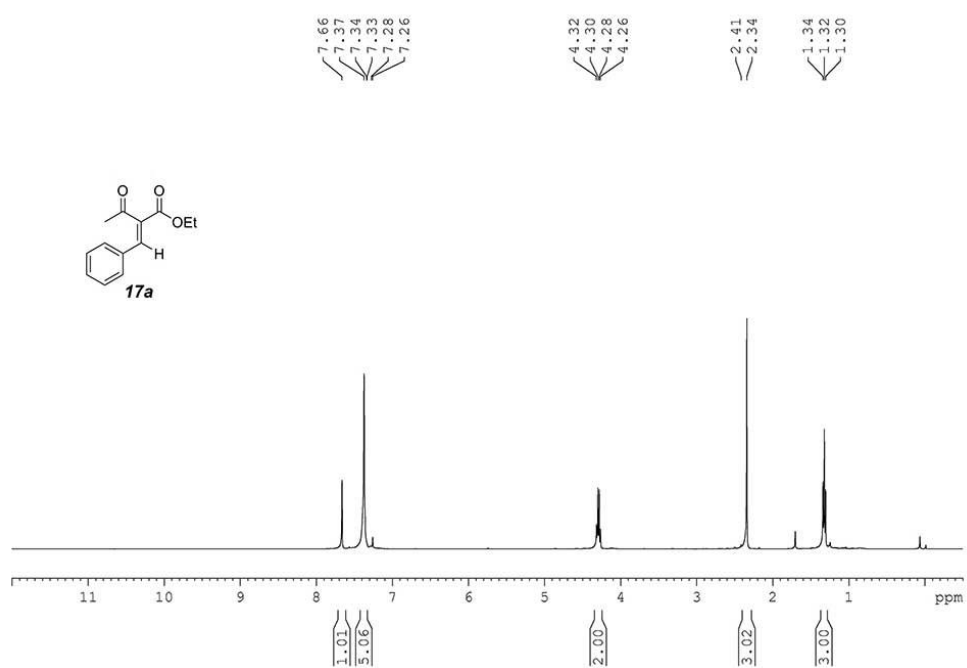

Figure S35. <sup>1</sup>H-NMR of **17a**

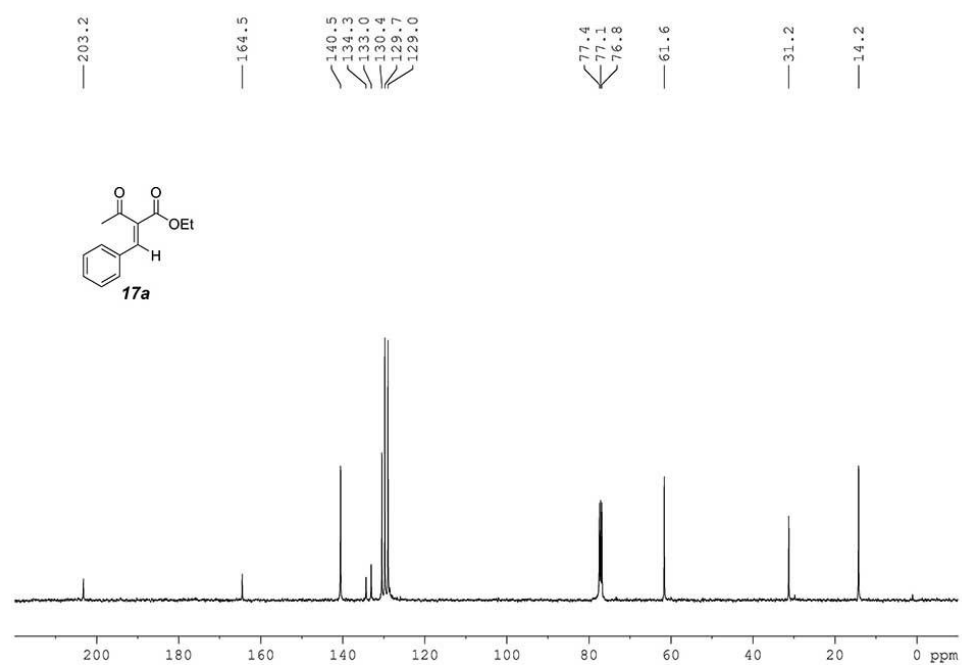

Figure S36. <sup>13</sup>C-NMR of **17a**

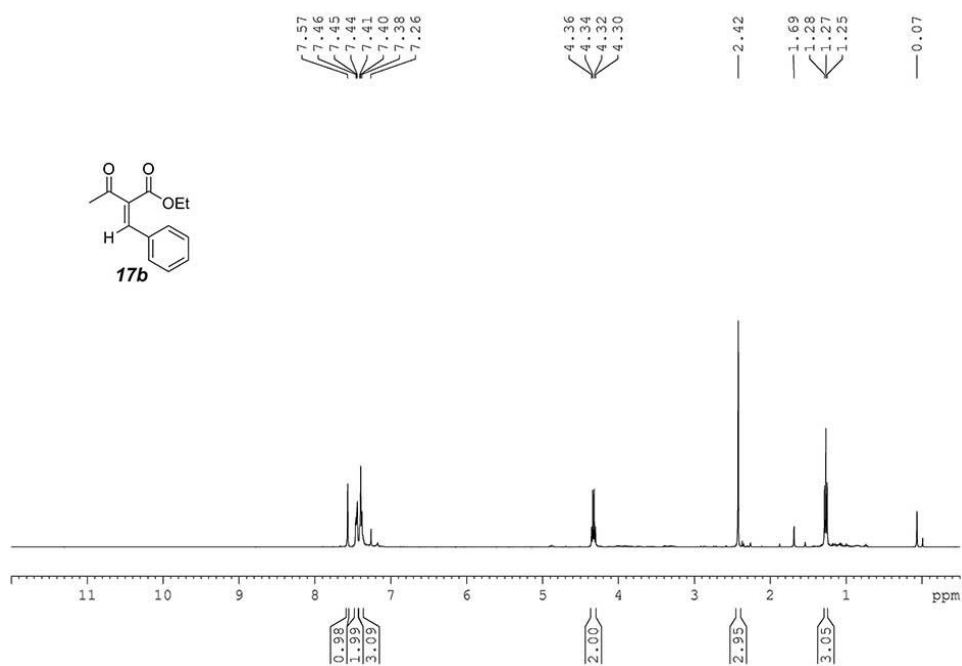

Figure S37. <sup>1</sup>H-NMR of **17b**

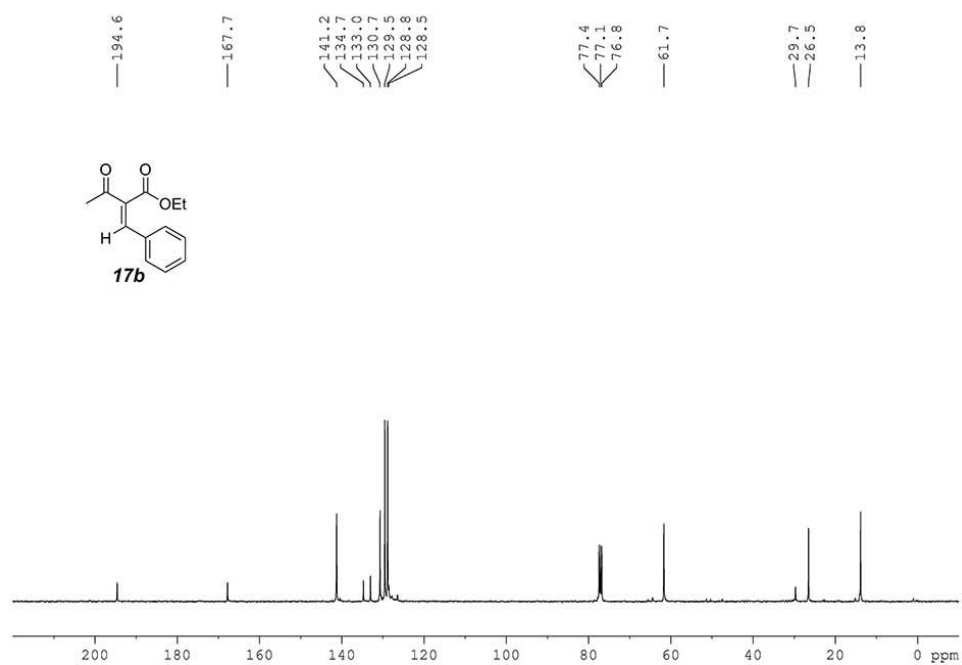

Figure S38. <sup>13</sup>C-NMR of **17b**

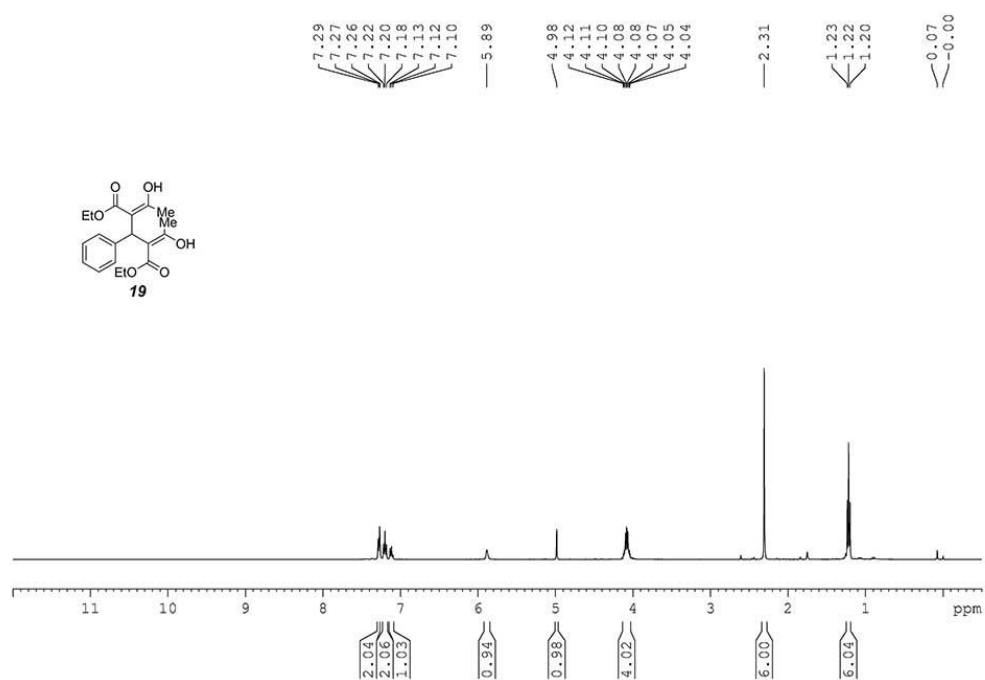

Figure S39. <sup>1</sup>H-NMR of **19**

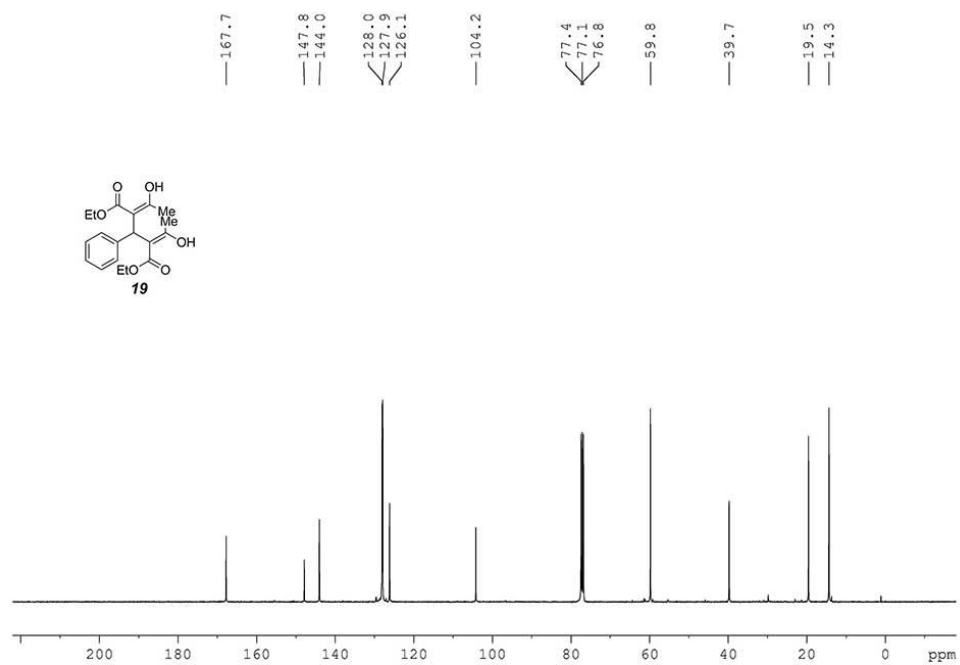

Figure S40. <sup>13</sup>C-NMR of **19**

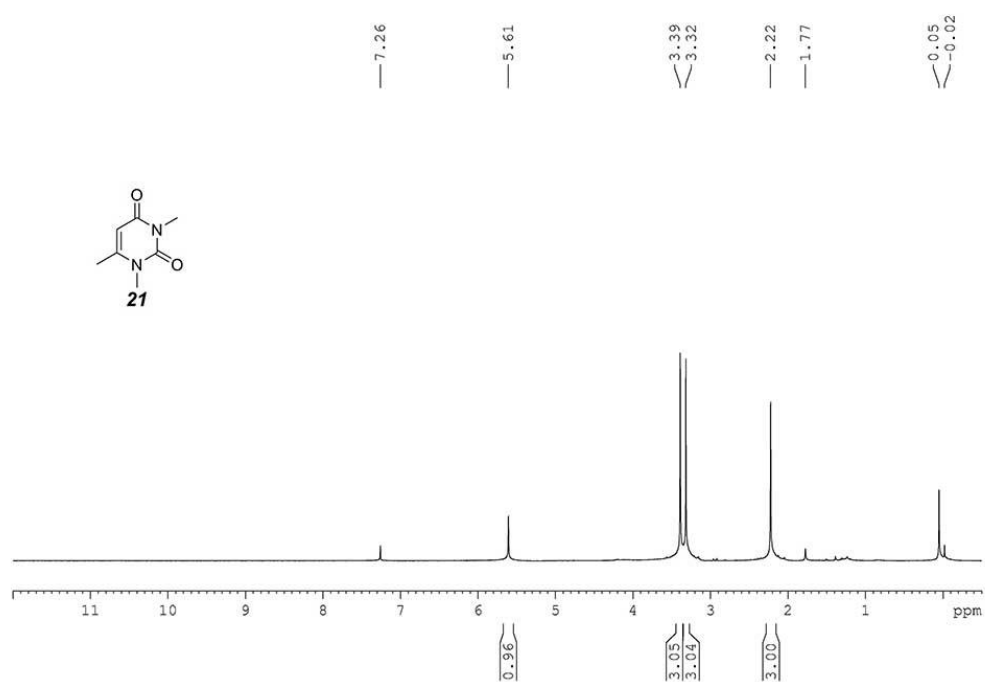

Figure S41. <sup>1</sup>H-NMR of **21**

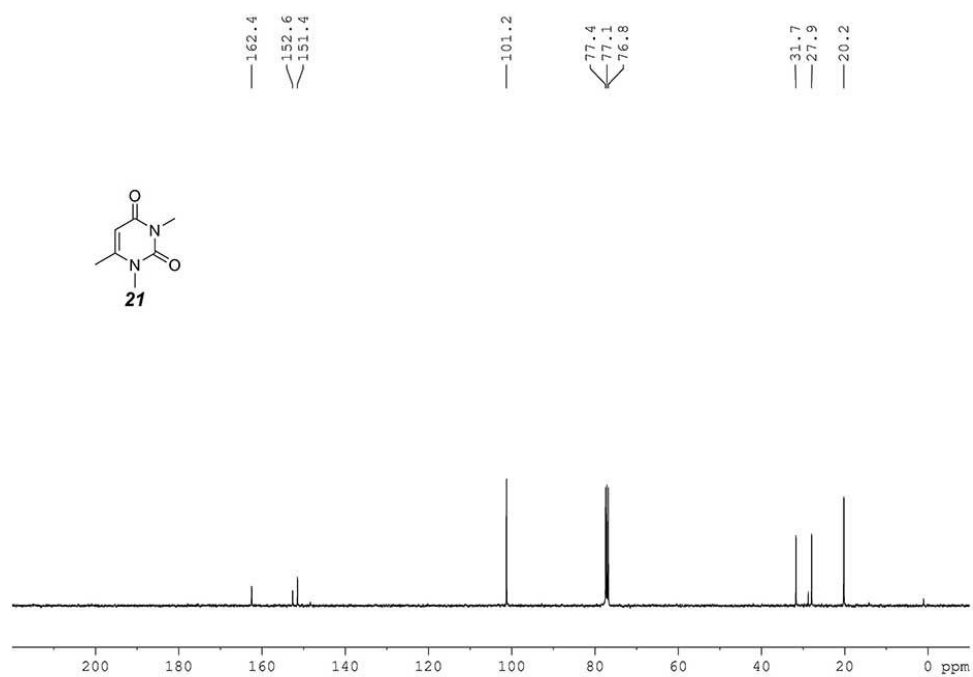

Figure S42. <sup>13</sup>C-NMR of **21**

### 3. The $^1\text{H}$ -NMR tracing of the H-D exchange reactions of methyl acetoacetate in $\text{MeOH-}d_4$

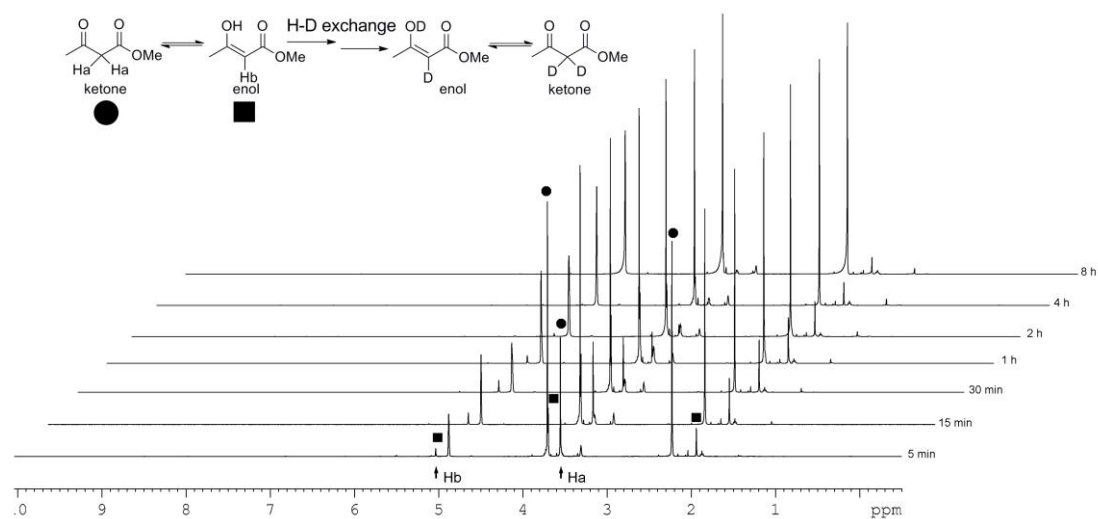

Figure S43.  $^1\text{H}$ -NMR of H-D exchange reaction of methyl acetoacetate in  $\text{MeOH-}d_4$  without  $\text{Hf}(\text{OTf})_4$

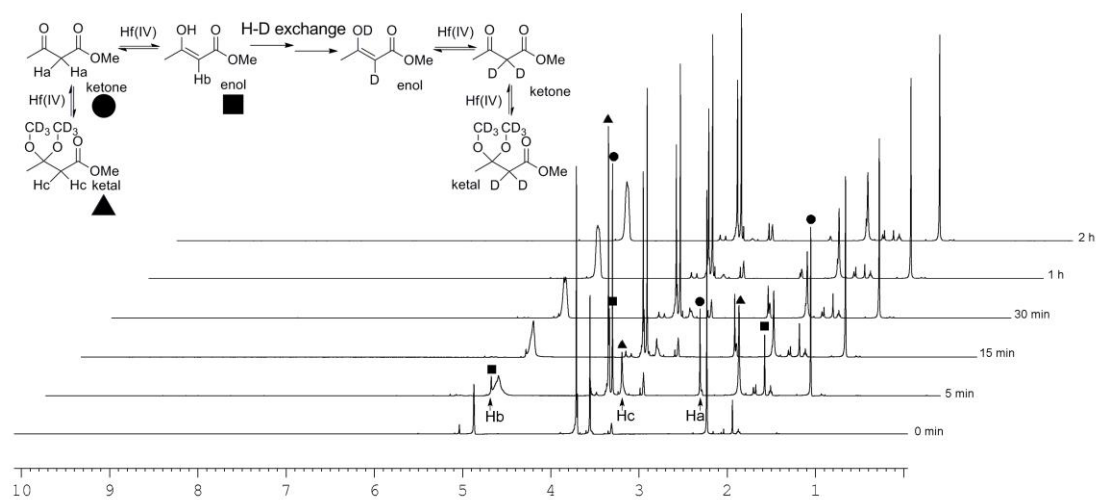

Figure S44.  $^1\text{H}$ -NMR of H-D exchange reaction of methyl acetoacetate in  $\text{MeOH-}d_4$  with 5 mol%  $\text{Hf}(\text{OTf})_4$
